1                    **New Insights into the Conformational Activation of Full-Length Integrin**  
2

3                    Tamara C. Bidone<sup>1</sup>, Anirban Polley<sup>1,#</sup>, Aleksander Durumeric<sup>1</sup>, Tristan Driscoll<sup>3</sup>, Daniel  
4                    Iwamoto<sup>4</sup>, David Calderwood<sup>4</sup>, Martin A. Schwartz<sup>2,3</sup>, Gregory A Voth<sup>1\*</sup>

5  
6                    <sup>1</sup>Department of Chemistry, Institute for Biophysical Dynamics, and James Franck Institute, The  
7                    University of Chicago, 5735 S. Ellis Ave., Chicago, Illinois 60637, USA.

8                    <sup>2</sup>Yale Cardiovascular Research Center and Department of Internal Medicine (Section of  
9                    Cardiovascular Medicine)

10                    <sup>3</sup>Departments of Cell Biology and Biomedical Engineering, Yale University, New Haven,  
11                    Connecticut 06511, USA.

12                    <sup>4</sup>Department of Pharmacology, Yale University, New Haven, Connecticut 06511, USA

13                    <sup>#</sup>*present address*: Department of Chemical Engineering, Columbia University, New York City

14  
15                    \* corresponding author: [gavoth@uchicago.edu](mailto:gavoth@uchicago.edu)  
16  
17

18 **ABSTRACT**

19

20 Integrin binding to extracellular matrix proteins is regulated by conformational transitions from  
21 closed, low affinity states to open, high affinity states. However, the pathways of integrin  
22 conformational activation remain incompletely understood. Here, by combining all-atom  
23 molecular dynamics simulation, coarse-graining, heterogeneous elastic network modeling, and  
24 experimental ligand binding measurements, we test the effect of integrin  $\beta$  mutations that  
25 destabilize the closed conformation. Our results support a “deadbolt” model of integrin  
26 activation, where extension of the headpiece is not coupled to leg separation, consistent with  
27 recent cryo-EM reconstructions of integrin intermediates. Moreover, our results are inconsistent  
28 with a “switchblade-like” mechanism. The data show that locally correlated atomistic motions  
29 are likely responsible for extension of integrin headpiece before separation of transmembrane  
30 legs, without persistence of these correlations across the entire protein. By combining modeling  
31 and simulation with experiment, this study provides new insight into the structural basis of full-  
32 length integrin activation.

33

34

## 35 INTRODUCTION

36  
37 Integrins are transmembrane receptors that signal bidirectionally across the plasma membrane to  
38 regulate cell processes such as adhesion, migration, differentiation, and mechanosensing (1–6).  
39 Integrins can be found in either bent conformations that bind to extracellular matrix (ECM)  
40 ligands with low affinity or in open, high affinity conformations (6–9). The structure of integrin  
41 resembles a large head and two legs, with the head containing sites for ligand binding. Both head  
42 and legs comprise several subdomains, interconnected by linkers. Owing to the large dimensions  
43 of the receptor and the complex interconnections between and within subdomains, that determine  
44 activation state, how integrin transits from bent to extended conformations is not totally  
45 understood.

46  
47 Integrins are heterodimers composed of an  $\alpha$  and a  $\beta$  subunit that associate non-covalently. For  
48 integrin  $\alpha v \beta 3$ , the two subunits form a structure with an extracellular ligand-binding headpiece,  
49 two transmembrane helices and two short cytoplasmic tails (10) (Figure 1). The  $\alpha v$  subunit  
50 consists of five extracellular domains: a seven-bladed  $\beta$ -*propeller* and a *thigh* domain, which is  
51 connected by the flexible *linker 1* to the *calf* domains, followed by the *transmembrane* and  
52 *cytoplasmic* or *tail* domains. The  $\beta 3$  subunit has seven domains with flexible interconnections:  
53 the  $\beta A$  domain is inserted into the *hybrid* domain, which is, in turn, inserted in the *plexin-*  
54 *semaphorin-integrin* (PSI) domain; these domains are followed by four cysteine-rich *epidermal*  
55 *growth factor* (EGF) modules and the *cytoplasmic* domain (11). The structure of the bent, low  
56 affinity integrin  $\alpha IIb \beta 3$ , which is closely related to  $\alpha v \beta 3$ , is represented in Figure 1a.

57  
58 Integrin activation occurs via a large scale conformational rearrangement involving relative  
59 motions between the  $\alpha$  and  $\beta$  subunits and their subdomains on the order of nanometers. Previous  
60 studies showed that localized changes of the  $\beta A$ /hybrid interface of the  $\beta$  subunit of both  $\alpha IIb \beta 3$   
61 and  $\alpha v \beta 3$  integrins, are critical for these movements (12–14). For example, the  $\alpha 7$  helix of the  
62  $\beta A$  domain shifts towards the hybrid domain in a piston-like movement that causes the hybrid  
63 domain to swing out by  $\sim 60^\circ$  (8, 15, 16). Also, upon activation, Glu318 in the  $\alpha$  subunit  $\beta$ -  
64 *propeller* domain becomes bound to the  $\beta$  subunit  $\beta A$  metal site (15, 17). These localized  
65 rearrangements in the integrin headpiece shift the conformation from bent to open (8, 12–14).  
66 Molecular dynamics (MD) simulations on  $\alpha v \beta 3$ , in combination with steered molecular  
67 dynamics (SMD) studies, have suggested that inter-domain contacts between the legs and  
68 headpiece raise the energy barrier that must be overcome for opening the  $\beta A$ /hybrid hinge (18).  
69 Therefore, concomitantly with the reorganization of both  $\alpha$  and  $\beta$  subunits in the integrin  
70 headpiece, opening of  $\alpha v \beta 3$  involves breaking the extensive interfaces between the headpiece  
71 and lower legs, and this is valid also for  $\alpha IIb \beta 3$  (12).

72  
73 Integrin activation also requires separation of the transmembrane legs. Previous work has studied  
74 the initiation of integrin opening by focusing on segments of the integrin headpiece at the  
75 nanosecond timescale (19). Less is known about how headpiece motions coordinate with leg  
76 separation, which occurs on the second timescale. In fact, several studies of integrin activation  
77 examined proteins with mutated, truncated, or entirely absent legs, thus preventing this kind of  
78 analysis (16, 20–22).

79

80 In order to explain the intrinsically multiscale mechanism of integrin opening, two conceptual  
81 models based on experimental observations have been proposed. In the “switchblade” model (8),  
82 opening of the  $\beta$ A/hybrid hinge and separation of transmembrane legs occur in a coordinated  
83 fashion. In contrast, the “deadbolt” model proposes more conservative changes around the bent  
84 structure with progressive loss of constraining contacts between  $\beta$ A domain and  $\beta$  tails that occur  
85 before leg separation (23). Thus, without dynamic, nonequilibrium information about how  
86 structural changes in the headpiece are coupled to the separation of the legs, major questions  
87 remain concerning the pathway of integrin opening.

88  
89 Recently, structures captured in various degrees of opening of full-length  $\alpha_{IIb}\beta_3$  integrin showed  
90 headpiece extension without leg separation (24). However, even in this scenario, it is still  
91 possible that electrostatic interactions in the  $\beta_3$  helix decrease upon headpiece extension and that  
92 a coordinated structural change occurs at the interface between the two legs without detectable  
93 separation, consistent with coordinated structural reconfiguration between headpiece and legs at  
94 short length and time scales.

95  
96 In order to understand the relationship between headpiece extension and legs separation, we have  
97 combined here a multiscale simulation approach with experimental ligand binding  
98 measurements. We tested the effect of activating mutants on the molecular structure and their  
99 impact on the long-range structural rearrangements of integrin. Our results support the notion  
100 that headpiece extension occurs before legs separation, consistent with a deadbolt model of  
101 integrin activation and inconsistent with a switchblade model. This mechanism is mediated by  
102 local, correlated atomistic motions within and between neighboring subdomains of the receptor,  
103 and independent from long-range interactions.

104

## 105 RESULTS

### 106 All atom molecular dynamics simulations of integrin mutants

107 Inspections of root mean square deviation (RMSD) plots of WT, single, and double integrin  
108 mutants showed that all structures reached local equilibrium states within 1  $\mu$ s of MD  
109 simulations (Figure 2a,d). Analysis of root mean square (RMS) fluctuations also showed that  
110 some of the most flexible regions of integrin are at the interface between the  $\beta$ -propeller and  $\beta$ A  
111 domains, together with the Linker 1 and EGF motifs, which form the  $\alpha$  and  $\beta$  genu, respectively  
112 (Figure 2b-c, e-f). There was no significant difference in RMS fluctuations between WT and the  
113 mutant integrins considered here. These data collectively support that the EGF domain region is  
114 relatively plastic, especially between EGF1 and EGF2, at the  $\beta$  knee, and at the PSI/hybrid and  
115 hybrid/I-EGF1 junctions. It was previously reported that the flexibility of the  $\beta$ A domain would  
116 also facilitate such interdomain interactions (15).

117  
118 Over the last 100 ns of the AA MD simulations, the average angle  $\langle \vartheta \rangle$  of the mutants was  
119 about 5-7% different from WT (Figure 3b);  $D_{12}$  was enhanced in the S243E mutant relative to  
120 both WT and other single/double mutants (figure 3c);  $D_{EM}$  was about 15% different for the single  
121 mutants and about 8% different in the double mutants relative to WT (Figure 3d). Accordingly,  
122 the single mutants showed enhanced persistency of high values of  $D_{EM}$  (Figure 3e). Time  
123 evolution of  $D_{12}$ ,  $D_{EM}$ , and corresponding probability distributions, are reported in Figure S1 and  
124 FigureS2 of the Supplemental Information. Time evolutions of  $\vartheta_1$  and  $\vartheta_2$  are reported in Figure  
125 S3. Both maximum values and standard deviations of  $\vartheta_1$  and  $\vartheta_2$  over the 1 $\mu$ s-long MD  
126 simulations were higher in S243E mutant than the other integrin single/double mutants (Figure  
127 S4a-b). Maximum value and standard deviation of  $\vartheta_1$ , over 1 $\mu$ s-long MD, were among the  
128 highest for D723R with respect to the other single mutants (Figure S4a-b). High standard  
129 deviations in the kink angles of S243E and D723R with respect to the other single mutants  
130 indicate that the configurations of the two headpiece hinges were far from their mean. Thus, the  
131 angles were more flexible in these mutant relative to the other single mutants examined. Also,  
132 maximum value and standard deviation for  $D_{12}$  were higher in the S243E and D723R (Figures  
133 S4c) relative to the other single mutants. Among the double mutants, D723R-E206T also showed  
134 high values of peak and standard deviation for kink angle, leg separation, and headpiece  
135 extension (Figure S4a-d). Taken together, these results support that the mutants here tested  
136 destabilize the integrin closed conformation by enhancing variability of kink angles in both  
137 subunits, leg separation, and/or overall distance of the headpiece from the transmembrane legs.

138  
139 We next addressed the molecular mechanism by which S243E, one of the most activating  
140 mutant, affects integrin conformation. In WT integrin, neutral histidine 244, negatively charged  
141 aspartic acid 113, and positively charged arginine 352 surround S243, with Arg352 at a distance  
142 (Figure 4a). In MD simulations of systems with protonated glutamic acid in S243E, a salt-bridge  
143 formed between the oxygen atom of arginine and the hydrogen atom of glutamic acid (Figure  
144 4b). Salt bridge formation was accompanied by reorientation of the positively charged arginine,  
145 which moved closer to the negative charged glutamic acid and re-oriented towards the negatively  
146 charged aspartic acid (figure 4b). These molecular rearrangements resulted in greater headpiece  
147 extension, flattening of kink angles and separation of the transmembrane legs in the MD  
148 simulations. Time evolution and probability density functions of distances of ARG352 from the  
149 center of mass of residues 244, 243 and 113 in WT and mutant conditions are in Figure S5.

150  
151 Taken together, the analysis of MD simulations showed local destabilization of the closed  
152 configuration in integrin mutants. However, structural quantities which are representative of  
153 integrin conformational activation at the level of the whole receptor, such as  $D_{EM}$ ,  $\vartheta_1$  and  $\vartheta_2$ , did  
154 not converge within 1  $\mu$ s. In order to allow for enhanced sampling of integrin long-range  
155 interactions, we instead used the MD trajectories to build CG models.

### 156 157 **Coarse-grained (CG) simulations**

158 Atomistic integrin structures were converted into CG systems, without the lipid bilayer included  
159 explicitly in the CG model, to detect large-scale motions of the receptor. As described earlier, we  
160 used a combination of ED-CG and heteroENM to create the CG model and systematically  
161 removed harmonic bonds or converted them into Morse potentials, motivated by the assumption  
162 that weak CG effective harmonic correlations between domains are likely to dissociate upon  
163 integrin activation. We analyzed our results to identify structural differences between WT and  
164 mutant integrins. Our goal was to sample multiple integrin states underlying the equilibrium  
165 conformers and to provide insight concerning which mutants most potently destabilize integrin  
166 closed states. We mapped the atomistic WT system to a CG ED-CG model of 200 CG sites or  
167 “beads”, with average resolution  $8 \pm 3$  residues per CG site, which is of the same order used  
168 previously (32). We compared the CG root mean square fluctuations from ED-CG-heteroENM at  
169 different initial cutoffs, spanning 3-5 nm, with those from atomistic simulations converted into  
170 CG fluctuations (Figure 5a). Using cutoffs of 3, 4, or 5 nm, the average differences in RMS  
171 fluctuations from the all-atom fluctuations were 0.11, 0.12 and 0.16 nm, respectively. We  
172 therefore chose a 3 nm cutoff for our CG systems that best reproduced atomistic fluctuations, and  
173 built ED-CG-heteroENM models for each mutant integrin (Figure 5b). The fraction of intra-  
174 domain springs was about 0.6 in all systems, with inter-domain springs that connected non-  
175 consecutive subdomains along the primary sequence below 0.2. Intra-domain connections had  
176 the highest spring constants, up to 25 kcalmol<sup>-1</sup>A<sup>2</sup> (Figure 5d), while inter-domain springs had  
177 about 3-fold lower characteristic spring constants, below 8 kcalmol<sup>-1</sup>A<sup>2</sup> (Figure 5e-f). Snapshots  
178 from a representative CG simulation showed average kink angles between 120-140 deg (Figure  
179 6a), depending on the particular mutant. These angles are about twice those from MD, showing  
180 that conformations far from equilibrium were sampled with this CG method and that the  
181 structures are extended. All mutants showed higher kink angles than WT  $\alpha\beta 3$  (Figure 6a). Also,  
182 comparison of the fraction of time that  $D_{EM}$  is above 95% of its maximum showed that all the  
183 mutants were above 15%, whereas WT integrin was below 10% (Figure 6b). Thus, in the CG  
184 simulations, the mutants were in extended conformations more often than WT. By capturing the  
185 effect of point mutations, our CG models of integrin were able to enhance sampling  
186 conformations from MD trajectories.

### 187 188 **Integrin affinity measurements**

189 Next, we directly measured integrin affinity for the well-characterized Fab fragment, Wow-1,  
190 whose RGD-dependent binding to  $\alpha\beta 3$  increases dramatically after activation (25). Wow1 is  
191 monomeric, minimizing possible effects of integrin clustering on its binding. Cells expressing  
192 WT or mutant  $\alpha\beta 3$  were incubated with Wow-1 in standard, Mg<sup>2+</sup>- and Ca<sup>2+</sup>-containing buffer  
193 or in the presence of Mn<sup>2+</sup>, which is commonly used as a positive control for maximal activation  
194 (34).  $\alpha\beta 3$ -null cells were used as a negative control. We found that in Ca<sup>2+</sup>/Mg<sup>2+</sup>, all of the  
195 point mutants showed significantly increased binding compared to WT, with no significant

196 differences detected among the activated mutants (Figure 7). Further, the activating mutants  
197 showed no further increase in the presence of  $Mn^{2+}$ . This last result implies that all of the  
198 mutants are maximally activated in these assays.

199

### 200 **CG simulations reveal intermediate states**

201 In all of our CG simulations, the integrin headpiece extended away from the legs, with the degree  
202 of extension depending on the mutant examined and the threshold of removed or converted  
203 harmonic interactions. Snapshots from a representative simulation of S243E, with springs  
204 preserved for  $k > 0.1 \text{ kcalmol}^{-1}\text{A}^2$ , are shown in Figure 8. We next computed the RMSD of the  
205 simulated systems for all of the single point mutants relative to the four cryo-EM structures (24).  
206 In particular, we looked at the configurations of wild type and mutant integrins that were closest  
207 to each cryo-EM structure, using the minimum RMSD from CG trajectories,  $\text{RMSD}_{\text{MIN}}$ , and  
208 compared how much they differed. Our results showed that for  $k > 0.001 \text{ kcalmol}^{-1}\text{A}^2$ , the single  
209 mutants deviate from the cryo-EM conformer more than the WT in the following cases: closed  
210 (Figure 9a) and first intermediate (Figure 9b) and open conformer (Figure 9d) cryo-EM. With  
211 respect to the second intermediate from the cryo-EM conformer, the mutant systems generally  
212 have higher  $\text{RMSD}_{\text{MIN}}$  than the WT for  $k > 0.0001 \text{ kcalmol}^{-1}\text{A}^2$ . The comparison of our CG  
213 mutants with full-length cryo-EM conformers from single molecule experiments show  
214 surprisingly strong structural similarity. This indicates that the simulations are consistent with a  
215 deadbolt model for integrin opening and inconsistent with the switchblade mechanism.  
216 Furthermore, the simulations show that this opening mechanism results from weakening low  
217 stiffness long-range correlations while preserving local dynamics correlations within each  
218 integrin subdomain and between pairs of neighboring subdomains along the primary protein  
219 sequence.

220

221



## 222 DISCUSSION

223

224 In this study, we have addressed how integrin headpiece extension coordinates with leg  
225 separation during integrin opening. We utilized a novel combination of AA MD simulation, ED-  
226 CG modeling, and a modified heteroENM approach that allows for large conformational change  
227 on single and double point mutants of full-length  $\alpha_V\beta_3$  integrin. We investigated whether  
228 destabilization of the closed conformation occurs as localized structural rearrangements or as  
229 more cooperative changes in the receptor headpiece and legs. Also, we used ligand binding  
230 experiments and comparison of our CG models with single molecule cryoEM integrin  
231 reconstructions to validate our modeling configurations.

232

233 The AA MD simulations, albeit of limited large-scale sampling, showed that  $\beta_3$  mutations  
234 induce molecular structural rearrangements in both headpiece and legs of  $\alpha$  and  $\beta$  subunits. In  
235 mutants, these rearrangements are generally enhanced relative to wild type integrins, by initiation  
236 of headpiece opening, flattening of the kink angle, and separation of the transmembrane helices  
237 (Figure 3). All mutants here analyzed destabilize the linkers within the  $\alpha$  and  $\beta$  subunits,  
238 including Linker 1 and the EGF motifs (Figure 2b-c, e-f), respectively. The effect of mutants on  
239 linkers could facilitate structural transition towards open states. This result is in agreement with  
240 previous data from MD simulations on the EGF- motifs of the  $\beta$  subunit single cysteine  
241 mutations (35). These studies suggested that rearrangement of disulfide bonds in mutants could  
242 be part of a cascade of thiol/disulfide exchange reactions for activation (35). Results from our  
243 AA MD simulations also reveal that while structural properties of the systems do not converge  
244 within 1  $\mu$ s (Figure S1 and Figure S3), the mutants that maximally destabilize the closed state are  
245 S243E and D723R (Figure S4). The hydrophilic surface area is known to be significantly larger  
246 for S243E compared to wild type  $\alpha_V\beta_3$  and other mutants. This reflects greater extension of the  
247 headpiece away from the lipid bilayer, flattening of both kink angles and initiation of separation  
248 of transmembrane helices (Figure 3c and Figure S4). The effect of S243E on the global structural  
249 reorganization of integrin is triggered by the formation of a salt bridge at the point of the  
250 mutation, which induced local reorientation of a histidine, aspartic acid and arginine (Figure 4).  
251 In the case of the double mutant D723R\_S243E, a salt bridge still forms in the  $\beta_A$  domain  
252 (Figure S6), but the altered electrostatic interactions induced by mutation of aspartic acid to  
253 arginine in the  $\beta$  transmembrane helix and its higher pKa generate more stable interactions  
254 within the two helices (Figure S7).

255

256 The result that a single mutation in the  $\beta_A$  domain of the  $\beta$  subunit can initiate structural opening  
257 is consistent with a number of previous MD studies of the integrin headpiece. For example,  
258 simulations of fibronectin-bound integrin headpiece showed that the ligand binding pocket at the  
259 interface between  $\alpha$  and  $\beta$  subunits together with the hinge between the  $\beta_A$  and hybrid domain of  
260 the  $\beta$  subunit are allosterically linked to initiate opening (18). In MD simulations of both  $\alpha_{11b}\beta_3$   
261 and  $\alpha_V\beta_3$  integrin headpieces, a common transition pathway for propagation of conformational  
262 changes within the  $\beta_A$  domain was identified as the precursor of structural opening (36),  
263 consistent with our results from modified heteroENM that opening of the  $\beta_A$ /hybrid junction can  
264 act as a hinge. Molecular simulations of the integrin headpiece were also previously performed  
265 in combination with experimental headpiece mutation to show that reorientation of the hybrid  
266 domain in the  $\beta$  subunit is required for structural activation (37). Forced unbending of the  
267 integrin  $\alpha_V\beta_3$  headpiece was simulated using SMD, which showed that pulling the head readily



268 induced changes starting from the headpiece (38). This supports that headpiece extension is very  
269 critical in integrin opening. In the current study, we used the full-length atomistic receptor  
270 which, unlike previous efforts, allowed us to characterize motional correlations between  
271 headpiece and legs and to further detect the impact of short versus long range correlations on  
272 integrin extension. With this study, we were also able to analyze the effect of the D723R  
273 mutation in the cytoplasmic tail of the  $\beta$  subunit, showing that propagation of structural  
274 activation can also be reproduced in this mutant.

275  
276 In order to set our MD results into a broader context and test whether headpiece extension and  
277 leg separation are correlated at longer time scales, we used multiscale CG methods on individual  
278 integrins (with effect of lipid bilayer implicitly included in the AA MD input), based on ED-CG  
279 and HeteroENM methods, which were developed in (32, 33). This approach reduced the number  
280 of integrin sites from 27215 to 200, and reduced the computational cost by >100-fold. We  
281 modified our standard heteroENM model so that it can undergo large scale conformational  
282 changes by systematically removing low stiffness springs or converting them into softer,  
283 dissociable Morse interactions to facilitate realistic conformational flexibility. The predictive  
284 validity of standard ED-CG-hENM approaches was therefore significantly extended to enable  
285 sampling of multiple integrin conformations outside of the AA MD used to parameterize aspects  
286 of the model.

287  
288 Results from the CG simulations confirmed that all mutants destabilized the integrin closed  
289 conformation via enhancement of kink angles and persistence of open configurations (Figure 6).  
290 This result was consistent with the experimental finding that WOW-1 binding was maximal for  
291 all of the mutants examined (Figure 7). However, this maximal activation for all mutants  
292 obscures possible differences. Dynamic measurements that are sensitive to the kinetics of  
293 activation will be an interesting target for future studies.

294  
295 We also compared our  $\alpha\beta$ 3 CG structures with cryo-EM reconstructions of  $\alpha$ IIB $\beta$ 3 integrins at  
296 different states of activation, which had observed headpiece extension before leg separation (24).  
297 Integrin extension in the CG models resulted from preserving local atomistic dynamics  
298 correlations within each integrin subdomain and between pairs of neighboring subdomains along  
299 the primary protein sequence, while removing weak molecular long-range correlations. This  
300 suggests that, in the case of limited sampling, certain correlations present in the AA MD  
301 simulations were not representative of correlations in the global conformational landscape.

302  
303

## 304 CONCLUDING REMARKS

305

306 Our results from AA MD simulations show that coordinated atomistic motions within and  
307 between headpiece and legs destabilize integrin closed conformation on time scales on the order  
308 of  $\mu\text{s}$  (8). However, at longer time scales, accessed via CG simulations, headpiece extension  
309 precedes leg separation. Also, this activation mechanism for  $\alpha\text{v}\beta\text{3}$  integrin is consistent with  
310 recent cryo-EM reconstructions of  $\alpha\text{IIb}\beta\text{3}$  integrin (20). In our simulations, extension of the  
311 headpiece occurs upon reduction of heteroENM effective harmonic interaction connectivity by  
312 maintaining connections within and between consecutive subdomains and modifying the low-  
313 frequency connections between distant subdomains. This implies that local contacts can persist  
314 during integrin opening and that long-range, low-frequency motional correlations are not  
315 consistent between closed and extended integrin states. Our model therefore supports the notion  
316 integrin extension results from disruption of weak, long-range interactions. In order for the legs  
317 to move apart in the model, stronger correlations between non-consecutive subdomains should  
318 also be reduced in the CG model, but this would lead to an overall loss of structural integrity and  
319 not only legs separation. Stated differently, our model is inconsistent with a switchblade  
320 mechanism.

321

322 To conclude, the main findings from this study are: (1) point mutations in the  $\beta$  subunit  
323 destabilize the  $\alpha\text{v}\beta\text{3}$  closed structure in the absence of extracellular or intracellular ligands; (2) in  
324 the mutants, both integrin headpiece and legs respond to destabilization of the closed  
325 configuration via transmission of conformational transitions through flexible linkers; (3) the  
326 S243E mutant is an “activating” mutation that acts not only on the integrin headpiece but also  
327 allosterically on the transmembrane helices at the molecular level; and (4) headpiece extension  
328 can occur before leg separation, similar to cryo-EM reconstructions and consistent with a  
329 deadbolt model of integrin activation (Figure 8 and Figure 9).

330

331 Our findings of more general relevance are the following. Motions induced by integrin distal  
332 parts, that are weakly correlated at the atomistic level, leads to increased structural flexibility in  
333 full-length integrin and can thus promote extension. This motion can be induced experimentally  
334 in WT integrin by extracellular ligand binding or intracellular binding of the cytoskeletal protein  
335 talin, that bind the receptor in distal locations. Extracellular or intracellular integrin binding  
336 proteins can thus modify weakly correlated interactions between distal subdomains of the  
337 receptor, while preserving stronger, local correlations within subdomains and between  
338 neighboring subdomains. The idea of preserving collective local motions for integrin structural  
339 activation points towards a view of the receptor as sensitive in conformation to changes of weak,  
340 long-range inter-domains interactions.

341

342

343

## 344 MATERIALS AND METHODS

345  
346 In order to characterize integrin conformational activation, we computationally reconstructed  
347 full-length  $\alpha_V\beta_3$  integrins embedded in a lipid bilayer. We mutated the WT conformer using  
348 single or double point activating mutations in the  $\beta_A$  domain of the  $\beta$  subunit, in the  
349 transmembrane  $\beta$  helix or in both. We tested whether initiation of integrin opening is, on the  
350 timescale of  $1\mu\text{s}$ , a local effect, involving only the headpiece or the legs, or a global  
351 phenomenon, with simultaneous structural rearrangements in both the headpiece and the legs.  
352 Then, we built coarse-grained models of each integrin system to sample a wider range of  
353 conformations and test correlations between headpiece extension and leg separation over longer  
354 times. With both MD and CG simulations, we tested which activating mutations favor structural  
355 opening. This result was verified with experiments using the monovalent ligand WOW-1Fab  
356 (25), which directly assesses  $\alpha_V\beta_3$  affinity state. Last, we compared our CG conformations with  
357 available cryo-EM reconstructions of  $\alpha_{IIb}\beta_3$  integrin, which is closely related to  $\alpha_V\beta_3$  (24).

### 358 359 All-atom simulations

360 To examine the effect of mutation on the conformation of full length integrin  $\alpha_V\beta_3$ ,  $\mu\text{s}$  length all-  
361 atom molecular dynamics (AA MD) simulations were performed on the integrins embedded in a  
362 lipid square patch (see Figure 1b). We assembled the bent headpiece of  $\alpha_V\beta_3$  integrin [from  
363 3IJE.pdb (26)] with its transmembrane helical and cytoplasmic parts [taken from 2KNC.pdb  
364 (27)], using homology modeling to reconstruct missing residues (28). Point mutations were  
365 selected based on studies that identified mutants that increased affinity for RGD ligands (12).  
366 Starting from this initial configuration, we used the VMD software (29) to build five single  
367 mutants and four double mutants: D723R, L138I, E206T, S243E, K417E, D723R-L138I,  
368 D723R-E206T, D723R-S243E and D723R-K417E. For each integrin, we generated a  
369 multicomponent model lipid bilayer with 80% DOPC and 20% DOPS lipids, using CHARMM-  
370 GUI membrane builder (30). We then removed lipids in the center of the lipid patch to make a  
371 hole and inserted the integrin (Figure 1b). Last, we placed the membrane/integrin system within  
372 a rectangular box and filled its space with TIP3P water molecules and 150 mM NaCl, for a total  
373 of about 1.2 million atoms. In order to reorganize the lipids around the integrin, energy  
374 minimization was run for 5000 steps of steepest descent algorithm, followed by 50 ns of position  
375 restraint in a constant NPT ensemble, using the Berendsen thermostat. Production AA MD  
376 simulation were carried out, using Gromacs 5.0.4 (31), for  $1\mu\text{s}$  in the NPT ensemble using Nose-  
377 Hoover thermostat and Parrinello-Rahman barostat to keep the temperature at 310 K and  
378 pressure at 1 atm. Long-range electrostatic interactions were incorporated through the PME  
379 method with a cut-off of 1 nm. The same cut-off value was used for Lennard-Jones interactions.

380  
381 In order to identify differences in headpiece versus leg arrangements between WT integrin and  
382 the mutants, we defined metrics that report both headpiece extension and legs separation (Figure  
383 3a). We quantified the following: kink angles,  $\vartheta_1$  and  $\vartheta_2$ , for  $\alpha$  and  $\beta$  subunits, respectively; their  
384 average,  $\vartheta$ ; transmembrane legs separation;  $D_{12}$ , and headpiece extension,  $D_{EM}$  (see schematics in  
385 Figure 3A). The angle  $\vartheta_1$  was defined in the  $\alpha$  subunit as the angle between points A1 (center of  
386 mass of residues 82-85 in the  $\beta$ -propeller domain), A2 (center of mass of residues 599-602,  
387 between tight domain and Linker 1) and A3 (center of mass of residues 963-966 in the  $\alpha$   
388 transmembrane helix); for the  $\beta$  subunit,  $\vartheta_2$  was defined as the angle between points B1 (center of

389 mass of residues 236-239 in the  $\beta$ A domain), B2 (center of mass of residues 480-484, between  
390 the hybrid domain and the EGF-1/EGF-2 motifs) and B3 (center of mass of residues 696-699 in  
391 the  $\beta$  transmembrane helix); E is a point at the interface between the two headpiece subunits and  
392 was defined as the center of mass between points A1 and B1; M was defined as the center of  
393 mass between points A3 and B3 (corresponding residues are 963-966 and 696-699 in the two  
394 helices); points A and B, whose distance was indicated with  $D_{12}$ , were given by the midpoints of  
395 each transmembrane helix.

396

### 397 **Coarse-grained model**

398 In order to fully become active, integrins must sample multiple intermediate conformational  
399 states (24). Many of these conformational states were not accessed by AA MD simulations  
400 owing to the relatively short timescales that can be sampled at that level. We therefore built CG  
401 models based on the observed motional correlations of atoms in MD simulations and used them  
402 to identify structural differences between the WT and mutants on effectively longer timescales.  
403 We first developed Essential Dynamics Coarse-graining (ED-CG) (32) and heterogeneous elastic  
404 network (HeteroENM) models (33) of each integrin starting from the AA MD trajectories  
405 (without explicit inclusion of the lipid membrane in these model-it is there in the AA MD data,  
406 however). The ED-CG approach was chosen in order to select CG sites which preserve  
407 independent motion in the CG protein, and because it is constructed from the primary protein  
408 sequence without distorting it when exploring a wide conformational space. The heteroENM  
409 approach was used to create effective harmonic interactions between the CG sites which directly  
410 capture nanoscale correlations from the AA MD simulations. This approach was critical for  
411 creating CG models that maintain molecular differences between the integrin mutants studied  
412 here.

413

414 However, our present application of ED-CG and heteroENM differs from previous studies in one  
415 important and novel way. In previous applications of ED-CG and heteroENM, the elastic  
416 network was created to replicate all fluctuation dynamics observed in the reference AA MD  
417 simulations (32, 33). Here, certain correlations present in the MD simulations only provide a  
418 glimpse of the larger scale changes in the global conformational landscape, because of their  
419 limited sampling. In order for the CG model to sample substantially beyond the observed  
420 reference AA MD configurations, the hENM procedure was modified in this work by reducing  
421 the effective harmonic connectivity of each hENM integrin as a model for large conformation  
422 changes. We either systematically removed a varying fraction of the effective harmonic  
423 potentials or converted some of the inter-domain harmonic interactions into “softer” Morse  
424 potentials. In particular, we modified only those inter-domain interactions between non-  
425 consecutive subdomains along the subunits in order to maintain connections along the primary  
426 sequence of the proteins. We tested conditions where harmonic interaction potentials with  
427 equilibrium stiffness  $k < 0.0005\text{-}0.1 \text{ kcalmol}^{-1}\text{A}^2$  were modified, using 200 CG sites and an  
428 enforced cutoff 3 nm for each integrin. By modifying a fraction of harmonic potentials with  $k$   
429 below  $0.0005 \text{ kcalmol}^{-1}\text{A}^2$ , no significant structural reconfiguration of the receptor was observed.  
430 By increasing the upper limit above  $0.1 \text{ kcalmol}^{-1}\text{A}^2$ , structural connectivity was lost. Upon  
431 performing CG dynamics on these systems, we evaluated their conformational motion in order to  
432 characterize whether destabilization of the closed integrin conformer occurs in a coordinated  
433 fashion between headpiece and legs, and detect which mutants most effectively destabilized the

434 closed conformation. Last, we compared our CG trajectories with mapped cryo-EM  
435 reconstructions of  $\alpha_{IIb}\beta_3$  integrin intermediates (24).

436

### 437 **Cell Lines**

438 Mouse lung endothelial cells (MLECs) were isolated from  $\beta_3$  integrin null mice.  $\beta_3$  integrin  
439 single point mutants were generously provided by Timothy Springer (Harvard University) and  
440 Mark Ginsberg (UCSD). Double mutants were constructed by standard site directed  
441 mutagenesis. These sequences were subcloned into pBOB vector and virus prepared in HEK  
442 293Tx cells by co-transfecting with pCMV-VSV-G and psPAX2 using Lipofectamine 2000  
443 (Invitrogen). The temperature sensitive mutant of the SV40 virus large T antigen was employed  
444 for conditional immortalization of these cells. Immortalized  $\beta_3^{-/-}$  MLECs were infected with  
445 wild-type (WT) or mutant  $\beta_3$  integrin viruses and subsequently sorted to obtain homogenous  
446 populations with equal expression levels. For expansion, MLECs were cultured in 1:1 Hams F-  
447 12 and low glucose DMEM with 20% FBS, 1% Penicillin-Streptomycin, 2.5mM glutamine and  
448 endothelial cell growth supplement (ECGS, 50mg/L) at the permissive temperature of 30°C. For  
449 experiments, cells were switched to 37°C to inactivate large T one day prior.

450

### 451 **Integrin activation measurements**

452 To measure integrin affinity state, cells were detached using 0.25% trypsin, washed with  
453 complete medium, resuspended in serum-free medium at  $13.3 \times 10^6$  cells/mL, and incubated with  
454 primary  $\beta_3$ -specific integrin ligands and secondary antibodies at  $4 \times 10^5$  cells in 50  $\mu$ L as  
455 described (34). Briefly, to assess surface expression of  $\beta_3$ , cells were incubated with 7H2  
456 primary antibody (Developmental Studies Hybridoma Bank), washed with DMEM, incubated  
457 with anti-mouse-Alexafluor-647 secondary antibody (Invitrogen), washed with DMEM, and  
458 resuspended in PBS. To assess  $\beta_3$  activation state, cells were incubated with WOW-1 primary  
459 Fab (generously provided by S. Shattil) in the presence or absence of 20 mM EDTA or 2 mM  
460  $MnCl_2$ , washed with DMEM, incubated with secondary F(ab')<sub>2</sub> anti-mouse IgG (H+L)  
461 Alexafluor-488 (Invitrogen), washed with DMEM, and resuspended in PBS. Primary antibody  
462 was omitted to assess background fluorescence. Fluorescence was measured on an LSRII flow  
463 cytometer (BD Biosciences). The  $\beta_3$ -integrin activation index of cells was calculated as  $AI = (F -$   
464  $F_o)/F_{integrin}$ , where F is the geometric mean fluorescence intensity (MFI) of WOW-1 binding  
465 after background subtraction,  $F_o$  is the MFI of WOW-1 binding in presence of EDTA inhibitor,  
466 and  $F_{integrin}$  is the normalized MFI of 7H2 antibody binding to cells. Activation was  
467 normalized to WT under native conditions for 4 independent experiments.

468

469

470 **ACKNOWLEDGEMENTS**

471

472 This research was supported by the DOD/ARO through a MURI grant W911NF1410403. This  
473 work was also partially supported by the University of Chicago Materials Research Science and  
474 Engineering Center, which is funded by National Science Foundation under award number  
475 DMR-1420709. Computational time was provided by the National Science Foundation XSEDE  
476 resources at the Pittsburgh Supercomputing Center.



477 **REFERENCES**

- 478
- 479 1. Hood, J.D., and D.A. Cheresh. 2002. ROLE OF INTEGRINS IN CELL INVASION AND  
480 MIGRATION. *Nat. Rev. Cancer.* 2: 91–100.
  - 481 2. Bershadsky, A.D., N.Q. Balaban, and B. Geiger. 2003. Adhesion-Dependent Cell  
482 Mechanosensitivity. *Annu. Rev. Cell Dev. Biol.* 19: 677–695.
  - 483 3. Ingber, D.E. 2003. Mechanobiology and diseases of mechanotransduction. *Ann Med.* 35:  
484 1–14.
  - 485 4. Ross, T.D., B.G. Coon, S. Yun, N. Baeyens, K. Tanaka, M. Ouyang, and M.A. Schwartz.  
486 2013. Integrins in mechanotransduction. *Curr. Opin. Cell Biol.* 25: 613–8.
  - 487 5. Vogel, V., and M. Sheetz. 2006. Local force and geometry sensing regulate cell functions.  
488 *Nat. Rev. Mol. Cell Biol.* 7: 265–275.
  - 489 6. Banno, A., and M.H. Ginsberg. 2008. Integrin activation. *Biochem. Soc. Trans.* 36: 229–  
490 234.
  - 491 7. Carman, C. V, and T.A. Springer. 2003. Integrin avidity regulation: are changes in affinity  
492 and conformation underemphasized? *Curr. Opin. Cell Biol.* 15: 547–56.
  - 493 8. Luo, B.-H., C. V Carman, and T.A. Springer. 2007. Structural basis of integrin regulation  
494 and signaling. *Annu. Rev. Immunol.* 25: 619–47.
  - 495 9. Ye, F., C. Kim, and M.H. Ginsberg. 2012. Reconstruction of integrin activation. *Blood.*  
496 119: 26–33.
  - 497 10. Hynes, R.O. 2002. Integrins: bidirectional, allosteric signaling machines. *Cell.* 110: 673–  
498 87.
  - 499 11. Campbell, I.D., and M.J. Humphries. 2011. Integrin Structure, Activation, and  
500 Interactions. *Cold Spring Harb. Perspect. Biol.* 3: a004994–a004994.
  - 501 12. Luo, B.-H., J. Karanicolas, L.D. Harmacek, D. Baker, and T.A. Springer. 2009. Rationally  
502 designed integrin beta3 mutants stabilized in the high affinity conformation. *J. Biol.*  
503 *Chem.* 284: 3917–24.
  - 504 13. Luo, B.-H., T.A. Springer, and J. Takagi. 2003. Stabilizing the open conformation of the  
505 integrin headpiece with a glycan wedge increases affinity for ligand. *Proc. Natl. Acad. Sci.*  
506 *U. S. A.* 100: 2403–8.
  - 507 14. Luo, B.-H., K. Strokovich, T. Walz, T.A. Springer, and J. Takagi. 2004. Allosteric <sup>NL</sup> 1  
508 Integrin Antibodies That Stabilize the Low Affinity State by Preventing the Swing-out of  
509 the Hybrid Domain\*.
  - 510 15. Xie, C., J. Zhu, X. Chen, L. Mi, N. Nishida, and T.A. Springer. 2010. Structure of an  
511 integrin with an  $\alpha$ I domain, complement receptor type 4. *EMBO J.* 29: 666–679.
  - 512 16. Xiao, T., J. Takagi, B.S. Collier, J.-H. Wang, and T.A. Springer. 2004. Structural basis for  
513 allostery in integrins and binding to fibrinogen-mimetic therapeutics. *Nature.* 432: 59–67.
  - 514 17. Huth, J.R., E.T. Olejniczak, R. Mendoza, H. Liang, E.A. Harris, M.L. Lupher, A.E.  
515 Wilson, S.W. Fesik, D.E. Staunton, and D.E. Staunton. 2000. NMR and mutagenesis  
516 evidence for an I domain allosteric site that regulates lymphocyte function-associated  
517 antigen 1 ligand binding. *Proc. Natl. Acad. Sci. U. S. A.* 97: 5231–6.
  - 518 18. Puklin-Faucher, E., M. Gao, K. Schulten, and V. Vogel. 2006. How the headpiece hinge  
519 angle is opened: new insights into the dynamics of integrin activation. *J. Cell Biol.* 175:  
520 349–360.
  - 521 19. Mehrbod, M., S. Trisno, and M.R.K. Mofrad. 2013. On the activation of integrin  $\alpha$ IIb $\beta$ 3:  
522 outside-in and inside-out pathways. *Biophys. J.* 105: 1304–15.

- 523 20. Adair, B.D., J.-P. Xiong, C. Maddock, S.L. Goodman, M.A. Arnaout, and M. Yeager.  
524 2005. Three-dimensional EM structure of the ectodomain of integrin  $\{\alpha\}V\{\beta\}3$  in  
525 a complex with fibronectin. *J. Cell Biol.* 168: 1109–18.
- 526 21. Mould, A.P., S.J. Barton, J.A. Askari, P.A. McEwan, P.A. Buckley, S.E. Craig, and M.J.  
527 Humphries. 2003. Conformational changes in the integrin beta A domain provide a  
528 mechanism for signal transduction via hybrid domain movement. *J. Biol. Chem.* 278:  
529 17028–35.
- 530 22. Zhu, J., J. Zhu, and T.A. Springer. 2013. Complete integrin headpiece opening in eight  
531 steps. *J. Cell Biol.* 201.
- 532 23. Arnaout, M.A., S.L. Goodman, and J.-P. Xiong. 2007. Structure and mechanics of  
533 integrin-based cell adhesion. *Curr. Opin. Cell Biol.* 19: 495–507.
- 534 24. Xu, X.-P., E. Kim, M. Swift, J.W. Smith, N. Volkmann, and D. Hanein. 2016. Three-  
535 Dimensional Structures of Full-Length, Membrane-Embedded Human  $\alpha(\text{IIb})\beta(3)$  Integrin  
536 Complexes. *Biophys. J.* 110: 798–809.
- 537 25. Pampori, N., T. Hato, D.G. Stupack, S. Aidoudi, D.A. Cheresh, G.R. Nemerow, and S.J.  
538 Shattil. 1999. Mechanisms and consequences of affinity modulation of integrin  
539  $\alpha(V)\beta(3)$  detected with a novel patch-engineered monovalent ligand. *J. Biol. Chem.*  
540 274: 21609–16.
- 541 26. Xiong, J.-P., B. Mahalingham, J.L. Alonso, L.A. Borrelli, X. Rui, S. Anand, B.T. Hyman,  
542 T. Rysiok, D. Müller-Pompalla, S.L. Goodman, and M.A. Arnaout. 2009. Crystal structure  
543 of the complete integrin  $\alpha V\beta 3$  ectodomain plus an  $\alpha/\beta$  transmembrane fragment. *J. Cell*  
544 *Biol.* 186: 589–600.
- 545 27. Yang, J., Y.-Q. Ma, R.C. Page, S. Misra, E.F. Plow, and J. Qin. 2009. Structure of an  
546 integrin  $\alpha\text{IIb}\beta 3$  transmembrane-cytoplasmic heterocomplex provides insight into  
547 integrin activation. *Proc. Natl. Acad. Sci. U. S. A.* 106: 17729–34.
- 548 28. Pettersen, E.F., T.D. Goddard, C.C. Huang, G.S. Couch, D.M. Greenblatt, E.C. Meng, and  
549 T.E. Ferrin. 2004. UCSF Chimera?A visualization system for exploratory research and  
550 analysis. *J. Comput. Chem.* 25: 1605–1612.
- 551 29. Humphrey, W., A. Dalke, and K. Schulten. 1996. VMD: Visual molecular dynamics. *J.*  
552 *Mol. Graph.* 14: 33–38.
- 553 30. Jo, S., J.B. Lim, J.B. Klauda, and W. Im. 2009. CHARMM-GUI Membrane Builder for  
554 Mixed Bilayers and Its Application to Yeast Membranes. *Biophys. J.* 97: 50–58.
- 555 31. Abraham, M.J., T. Murtola, R. Schulz, S. Páll, J.C. Smith, B. Hess, and E. Lindah. 2015.  
556 Gromacs: High performance molecular simulations through multi-level parallelism from  
557 laptops to supercomputers. *SoftwareX.* 1–2: 19–25.
- 558 32. Zhang, Z., L. Lu, W.G. Noid, V. Krishna, J. Pfandner, and G.A. Voth. 2008. A  
559 Systematic Methodology for Defining Coarse-Grained Sites in Large Biomolecules.  
560 *Biophys. J.* 95: 5073–5083.
- 561 33. Lyman, E., J. Pfandner, and G.A. Voth. 2008. Systematic multiscale parameterization of  
562 heterogeneous elastic network models of proteins. *Biophys. J.* 95: 4183–92.
- 563 34. Bouaouina, M., D.S. Harburger, and D.A. Calderwood. 2011. Talin and Signaling  
564 Through Integrins. In: *Methods in molecular biology* (Clifton, N.J.). . pp. 325–347.
- 565 35. Levin, L., E. Zelzion, E. Nachliel, M. Gutman, Y. Tsfadia, and Y. Einav. 2013. A Single  
566 Disulfide Bond Disruption in the  $\beta 3$  Integrin Subunit Promotes Thiol/Disulfide Exchange,  
567 a Molecular Dynamics Study. *PLoS One.* 8: e59175.
- 568 36. Provasi, D., M. Murcia, B.S. Collier, and M. Filizola. 2009. Targeted molecular dynamics

- 569 reveals overall common conformational changes upon hybrid domain swing-out in  $\beta 3$   
570 integrins. *Proteins Struct. Funct. Bioinforma.* 77: 477–489.
- 571 37. Cheng, M., J. Li, A. Negri, B.S. Coller, and L.R. Languino. 2013. Swing-Out of the  $\beta 3$   
572 Hybrid Domain Is Required for  $\alpha \text{IIb}\beta 3$  Priming and Normal Cytoskeletal Reorganization,  
573 but Not Adhesion to Immobilized Fibrinogen. .
- 574 38. Chen, W., J. Lou, J. Hsin, K. Schulten, S.C. Harvey, and C. Zhu. 2011. Molecular  
575 Dynamics Simulations of Forced Unbending of Integrin  $\alpha \text{V}\beta 3$ . *PLoS Comput. Biol.* 7:  
576 e1001086.  
577  
578

579 **FIGURES**

580

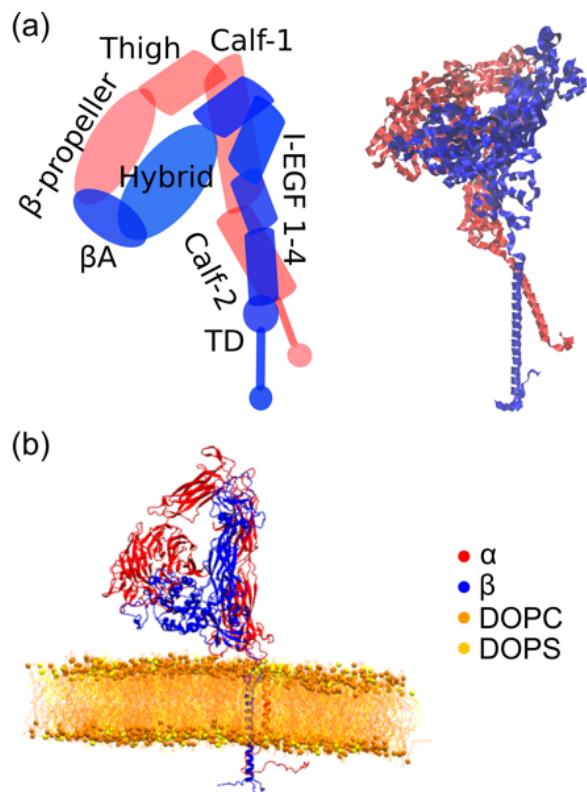

581

582 **Figure 1. Structures of full length, closed  $\alpha_{IIb}\beta_3$  and  $\alpha_V\beta_3$  integrins and corresponding**

583 **molecular models.** (a) Structure of  $\alpha_{IIb}\beta_3$  integrin in its closed, low affinity conformation.

584 Subunits  $\alpha$  and  $\beta$  are represented in red and blue, respectively. Corresponding ribbon

585 representation of closed  $\alpha_{IIb}\beta_3$  integrin on the right (from (24)). (b) Ribbon representation of

586 atomistic full-length  $\alpha_V\beta_3$  integrin embedded in DOPC/DOPS (4:1) lipid bilayer.

587

588  
589

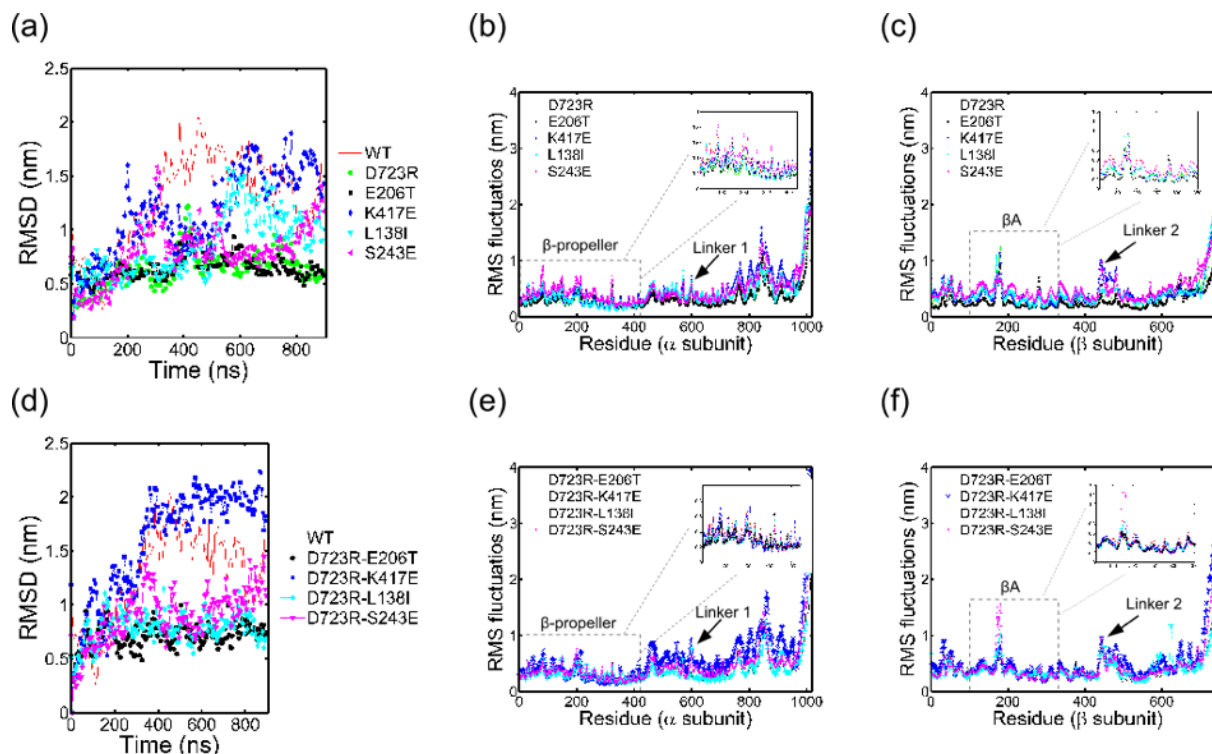

590  
591 **Figure 2. All atom molecular dynamics simulations of integrin  $\alpha\beta 3$  mutants.** (a) Time  
592 evolution of root mean square deviations of the atomistic  $C_{\alpha}$  for WT and single integrin mutants  
593 relative to the corresponding equilibrated configurations used as input to the MD. (b) Root mean  
594 square fluctuations of individual residues in the  $\alpha$  subunit of WT and single integrin mutants. (c)  
595 Root mean square fluctuations of individual residues in the  $\alpha$  subunit of WT and single integrin  
596 mutants. Color code in (a), (b), and (c) is: WT (red), D723R (green), E206T (black), K417E  
597 (blue), L138I (cyan), S243E (magenta). (d) Time evolution of root mean square deviations of the  
598 atomistic  $C_{\alpha}$  for WT and double integrin mutants relative to the corresponding equilibrated  
599 configurations given as input to the MD. (e) Root mean square fluctuations of individual residues  
600 in the  $\alpha$  subunit of WT and double integrin mutants. (f) Root mean square fluctuations of  
601 individual residues in the  $\alpha$  subunit of WT and double integrin mutants. Color code in (d), (e),  
602 and (f) is: WT (red), D723R-E206T (black), D723R-K417E (blue), D723R-L138I (cyan),  
603 D723R-S243E (magenta).

604

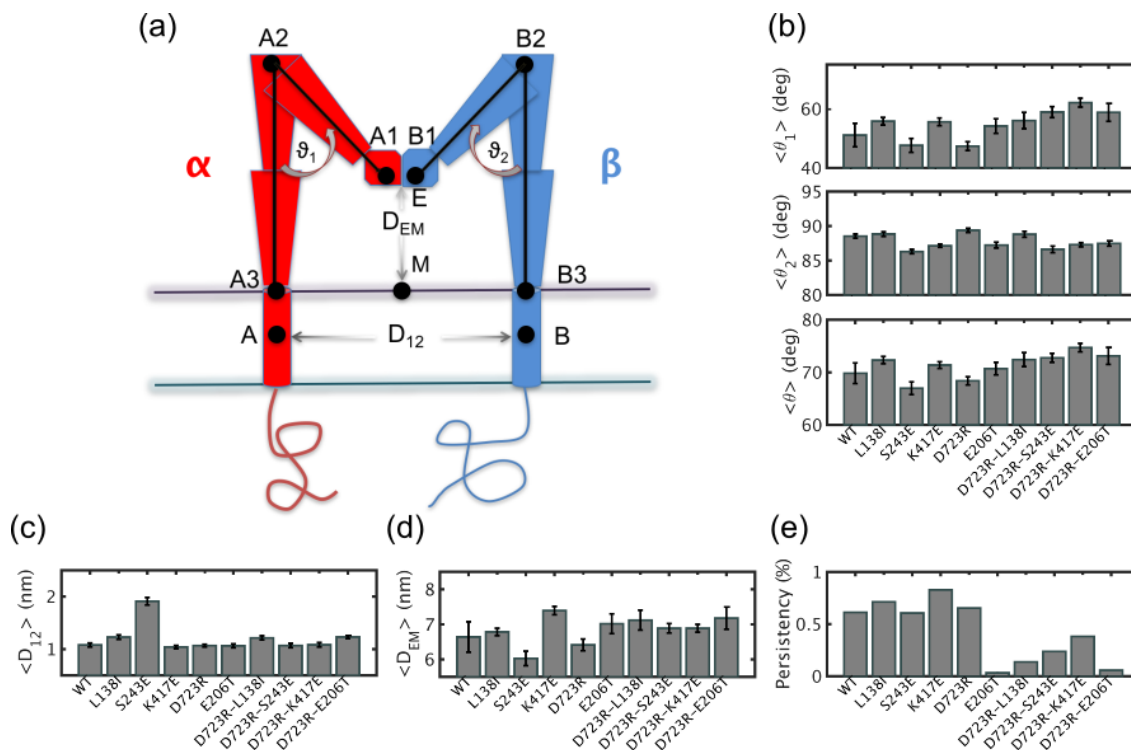

605  
 606 **Figure 3. Leg separation, headpiece extension and kink angles in the last 100 ns of AA MD**  
 607 **simulations.** (a) Schematic diagram of  $\alpha\beta_3$  in a lipid bilayer membrane, with red and blue  
 608 elements representing  $\alpha$  and  $\beta$  subunits, respectively. The horizontal lines indicate upper and  
 609 lower membrane leaflets. Points A1, A2, A3 on the  $\alpha$  subunit and points B1, B2, B3 on the  $\beta$   
 610 subunit are used to characterize corresponding kink angles,  $\vartheta_1$  and  $\vartheta_2$ . Distance  $D_{12}$  indicates  
 611 separation between the two transmembrane helices and  $D_{EM}$  is a measure of headpiece extension  
 612 from the membrane. (b) Average values of  $\vartheta_1$ ,  $\vartheta_2$  and  $\vartheta$  in WT and mutant integrins, computed  
 613 between 900-1000 ns of MD simulations. (c) Average values of  $D_{12}$  in WT and mutant integrins.  
 614 (d) Average values of  $D_{EM}$  in WT and mutant integrins. (e) Persistence of extended state for WT  
 615 and mutant integrins, computed as the fraction of time, between 900-1000nm of MD, that  $D_{EM}$   
 616 was at least 95% of its maximum value



617

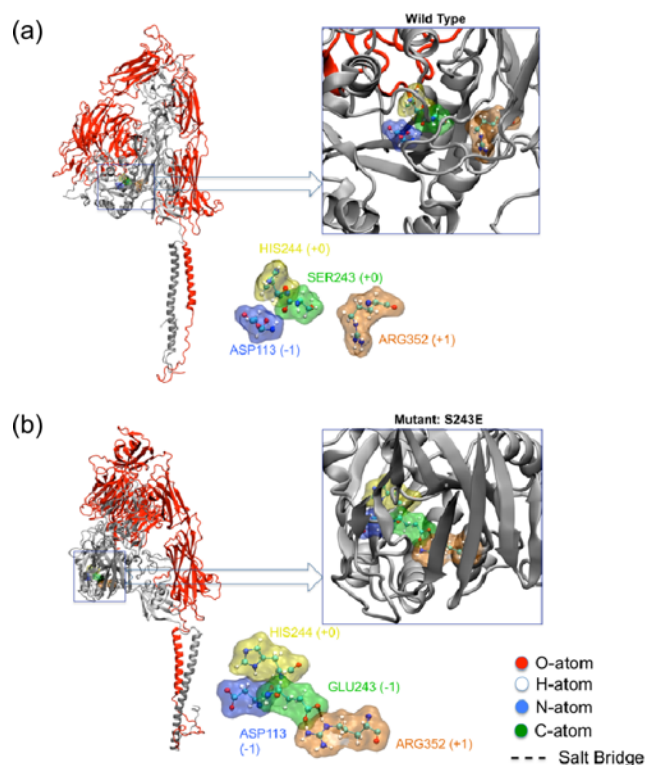

618

619 **Figure 4. S243E triggers formation of a salt bridge in the  $\beta$ A domain of  $\beta$  subunit.**

620 Cartoon representation of full length WT integrin with  $\alpha$  subunit in red and  $\beta$  subunit in grey.

621 Highlighted and zoomed are the amino acids surrounding S243 (green): histidine (yellow),

622 aspartic acid (violet) and arginine (orange) (b). Cartoon representation of full length mutant

623 integrin with  $\alpha$  subunit in red and  $\beta$  subunit in grey. Highlighted and zoomed are the amino acids

624 surrounding mutated S243E, using the same color code as in (a). Dashed line shows a salt bridge

625 between negative Glu243 and positive Arg352. Oxygen, hydrogen, nitrogen and carbon atoms

626 are shown in ball and stick representation in red, white, blue and green, respectively.

627  
628  
629

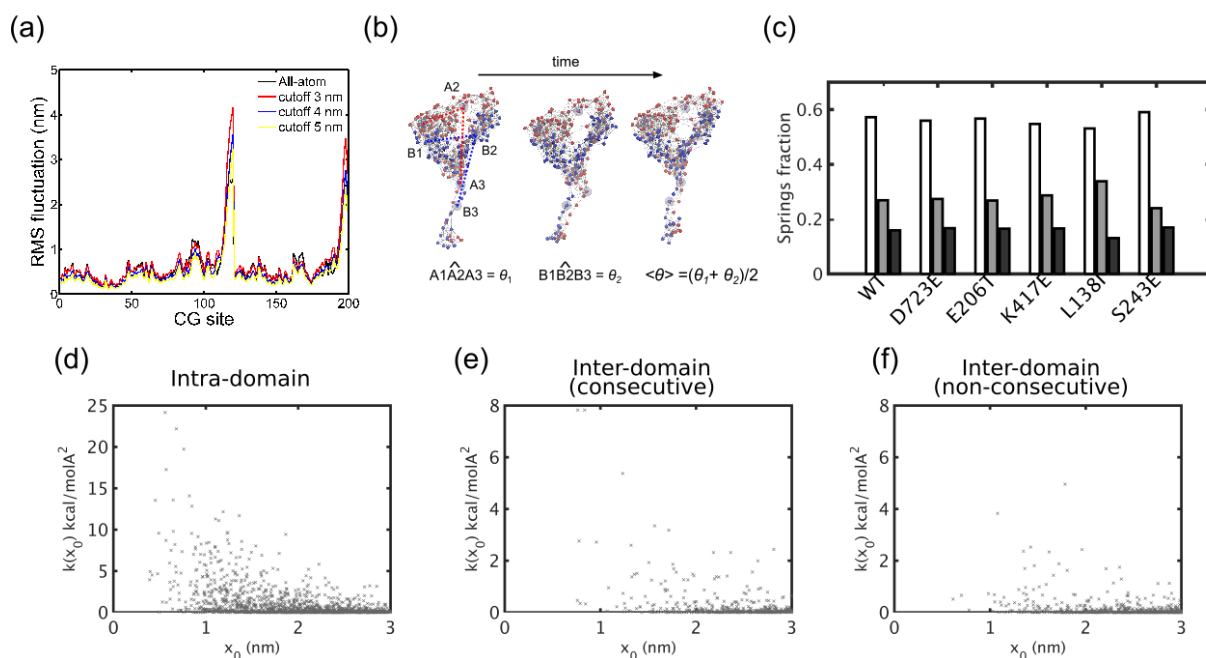

630  
631 **Figure 5. ED-CG-heteroENM models of integrin mutants.** (a) Per-CG-site root mean square  
632 fluctuations of WT integrin computed from AA MD simulations and ED-CG-heteroENM  
633 integrin using cutoffs of 3, 4, and 5 nm. (b) Snapshots from CG-heteroENM S243E integrin  
634 simulations, with red indicating CG-sites of the  $\alpha$  subunit and blue indicating CG-sites of the  $\beta$   
635 subunit. Bonds represent harmonic interactions. CG-sites representing A1, A2, A3 and B1, B2,  
636 B3 are mapped from atomistic residues. (c) Fraction of harmonic interactions from hetero-ENM,  
637 for WT and single mutant integrins: interactions within each domain (white); between  
638 consecutive subdomains along the primary aminoacidic sequence (grey), and between non-  
639 consecutive subdomains (black). (d) Spring constants of intra-domain interactions between CG-  
640 sites, as a function of equilibrium lengths  $x_0$  for heteroENM D723R. (e) Spring constants for CG-  
641 sites of consecutive subdomains, versus  $x_0$  for heteroENM D723R. (f) Spring constants of CG-  
642 sites of non-consecutive subdomains, as a function of  $x_0$  for heteroENM D723R.

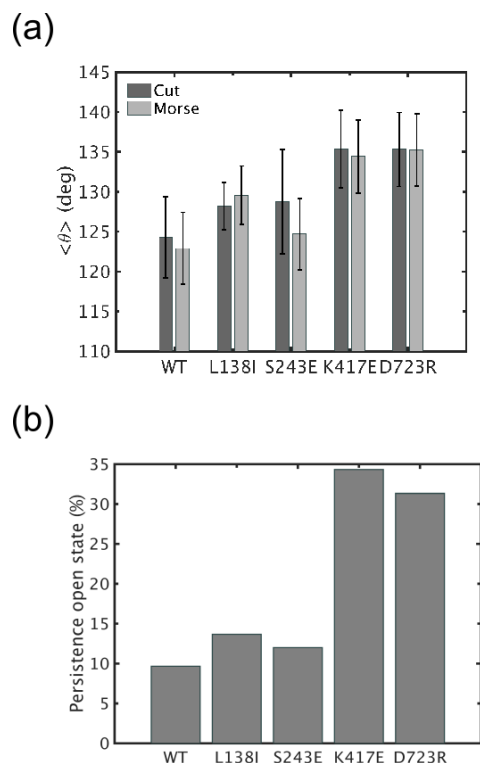

643  
644 **Figure 6. CG simulations of integrin mutants.** (a) Average kink angle computed as mean of  $\vartheta_1$   
645 and  $\vartheta_2$  over the course of the CG simulations, using WT and single mutant integrin with elastic  
646 springs above a threshold ( $k(x_0) > 0.005 \text{ kcalmol}^{-1}\text{A}^2$ ) and either cut (eliminated) springs or soft  
647 Morse potentials below the threshold. (b) Persistence of the integrin open state, computed as the  
648 percentage of simulation time during which integrin has  $D_{EM}$  above 95%, its maximum value  
649 (results for cut springs above  $k(x_0) > 0.1 \text{ kcalmol}^{-1}\text{A}^2$ ).  
650

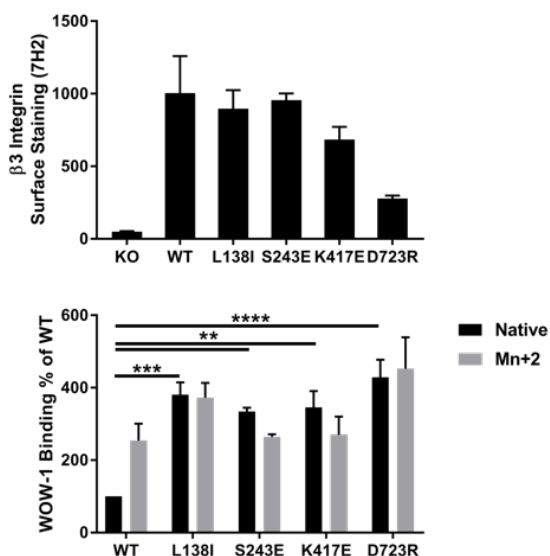

651  
652  
653  
654  
655  
656  
657  
658  
659  
660  
661

**Figure 7. Integrin activation assays.**  $\alpha_v\beta_3$  activation was assayed experimentally by binding of the monomeric, ligand-mimetic Fab, WOW-1.  $\beta_3$  integrin knockout cells expressing wild type or mutant  $\beta_3$  in suspension were stained Alexa647-conjugated antibody 7H2 that binds to all  $\alpha_v\beta_3$ , and with Alexa488-conjugated WOW-1 by flow cytometry (~ 500k cells per condition). Binding of WOW-1 was normalized to the average total  $\beta_3$  integrin (a). Binding was performed under native, EDTA, and Mn<sup>2+</sup> conditions. WOW-1 binding is shown relative to WT in native conditions (b). Values are means  $\pm$  SEM, n=4 independent experiments. (\*\* p < 0.01, \*\*\* p < 0.001, \*\*\*\* p < 0.0001, Two-way ANOVA with Sidak's multiple comparisons test)

662

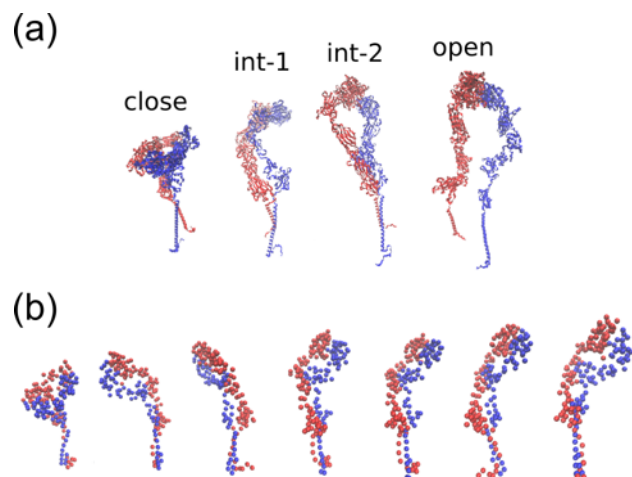

663

664 **Figure 8. CG models show that headpiece extension occurs without legs separation.** (a)

665 reconstructed configurations from cryo-EM (24): closed; first intermediate; second intermediate

666 and open conformers. (b) Representative snapshots from CG simulations of S243E with cut

667 springs below  $k(x_0) = 0.1 \text{ kcalmol}^{-1}\text{A}^2$ , showing extension of the closed conformer.

668

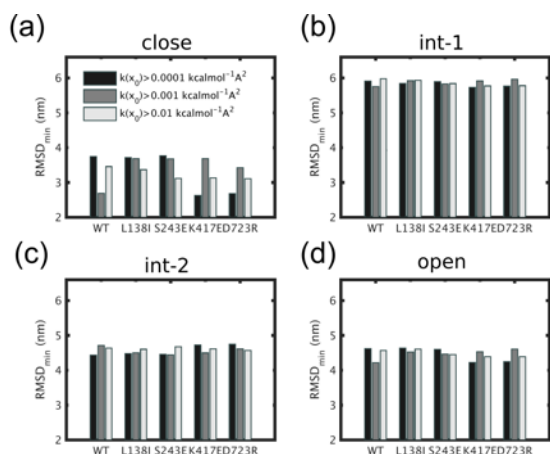

669  
670 **Figure 9. Comparison of CG-heteroENM structures with cryo-EM reconstructions of**  
671 **closed, intermediate and open integrins** (a) Minimum RMSD between CG-heteroENM  
672 simulations and the closed conformer. (b) Minimum RMSD between CG-heteroENM  
673 simulations and the first integrin intermediate. (c) Minimum RMSD between CG-heteroENM  
674 simulations and second integrin intermediate. (d) Minimum RMSD between CG-heteroENM  
675 simulations and open integrin conformer.  
676
